# Supplementary material for: Highly durable, perfluorinated Q(PFBE-co-VBC) and PVDF blend anion exchange membranes with interconnected morphological features for electrochemical energy conversion systems
Source: Royal Society of Chemistry journal article supplement (doi:10.1039/d3nj02005c), 2023-01-01
Supplement: d3nj02005c1.pdf [file d3nj02005c1.pdf]

## Electronic Supplementary Information

### Highly durable, perfluorinated Q (PFBE-co-VBC) and PVDF blend anion exchange membranes with interconnected morphological features for electrochemical energy conversion systems<sup>†</sup>

S. Hosimin,<sup>a,b</sup> V. Varshini,<sup>a</sup> A. Kalaiyarasi,<sup>a</sup> S. Vengatesan,<sup>a,c\*</sup> S. Ravichandran,<sup>a,c</sup>

C. S. A. Djadocks,<sup>a,d</sup> S. Vasudevan<sup>a,c</sup>

## Table of contents

Scheme S1. Cross-linked, interconnected network structure of anion exchange polymer

Figure S1. FTIR spectra of (PFBE-co-VBC) and quaternized TMA Q (PFBE-co-VBC) co-polymers

Figure S2.  $^{13}\text{C}$ -NMR spectrum of (PFBE-co-VBC) co-polymer with PVBC and VBC ratio 3:1

Figure S3. GPC chromatogram of (PFBE-co-VBC) co-polymer with PVBC and VBC ratio 3:1

Figure S4. FTIR spectra of PVDF, Q (PFBE-co-VBC) polymers and PVDF + Q(PFBE-co-VBC) blend membranes

Figure S5. (a) FE-SEM cross-sectional image and (b), (c), (d), (e), (f) elemental mapping images of PVDF - Q (PFBE-co-VBC) blend membrane with 1: 0.33 ratio

Figure S6. (a) TG curves and (b) DSC curves of the anion exchange membranes with different PVDF and Q (PFBE-co-VBC) ratios

Figure S7. Tensile properties of PVDF - Q (PFBE-co-VBC) blend anion exchange membrane with 1:1 ratio

Figure S8. (a) Membrane-electrode-assembly and (b) Electrolyser cell configuration used in the current study

Figure S9. Chronoamperometry curves of the single cell using commercial FAA-3-50 membrane and Ni @ Ni-foam electrodes in 0.1M KOH solution at 25 °C

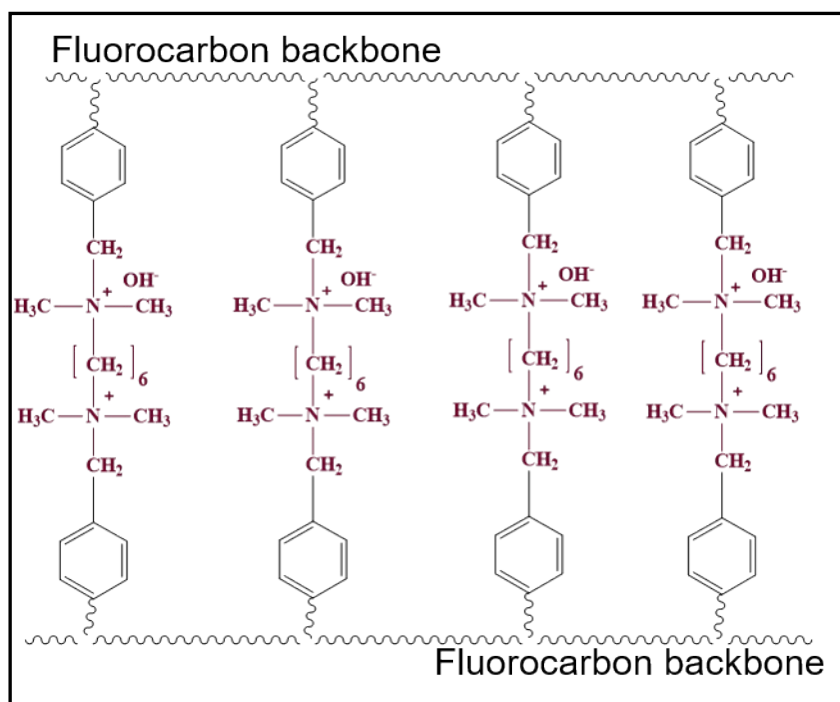

Scheme S1. Cross-linked, interconnected network structure of anion exchange polymer

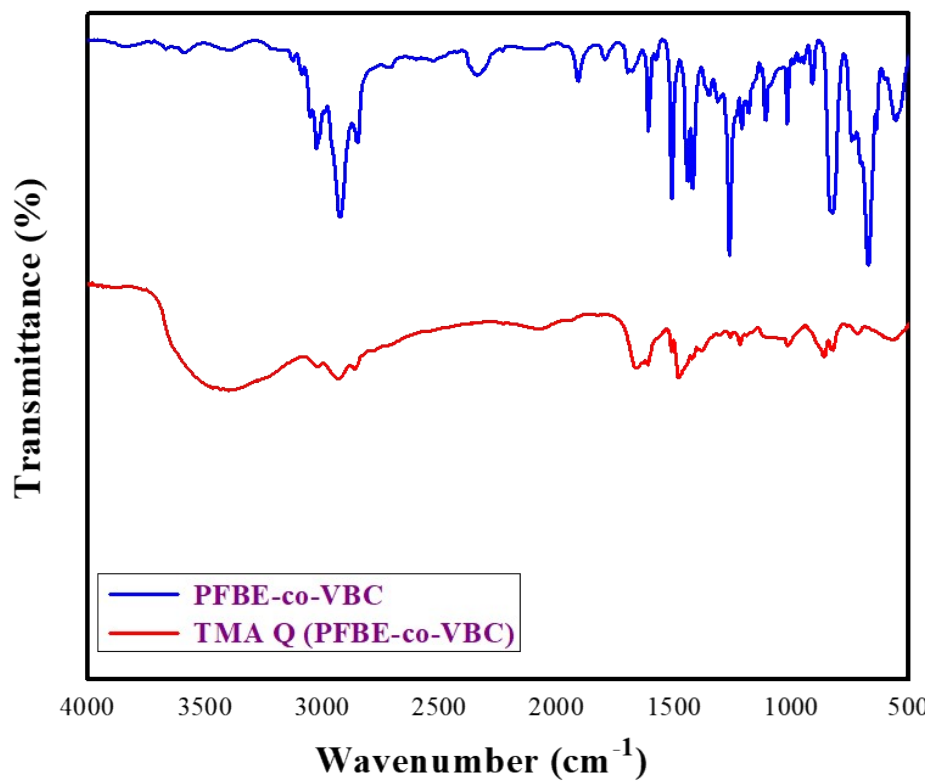

Figure S1. FTIR spectra of (PFBE-co-VBC) and quaternized TMA Q (PFBE-co-VBC) copolymers

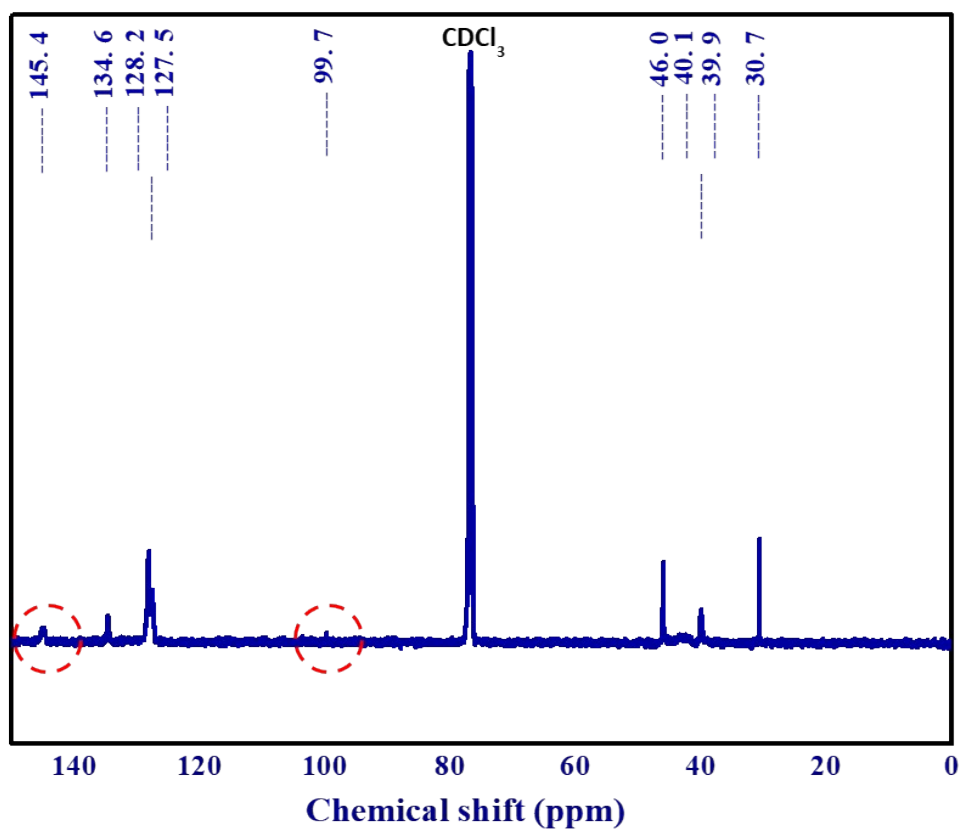

Figure S2.  $^{13}\text{C}$ -NMR spectrum of (PFBE-Co-VBC) co-polymer with PVBC and VBC ratio 3:1

Aromatic hydrocarbon (VBC): 39.9 ppm, 40.1 ppm, 46.0 ppm, 127.5 ppm, 128.2 ppm, 134.6 ppm

Fluorocarbon (PFBE): 30.7 ppm, 40.1 ppm, 99.7 ppm, 145.4 ppm

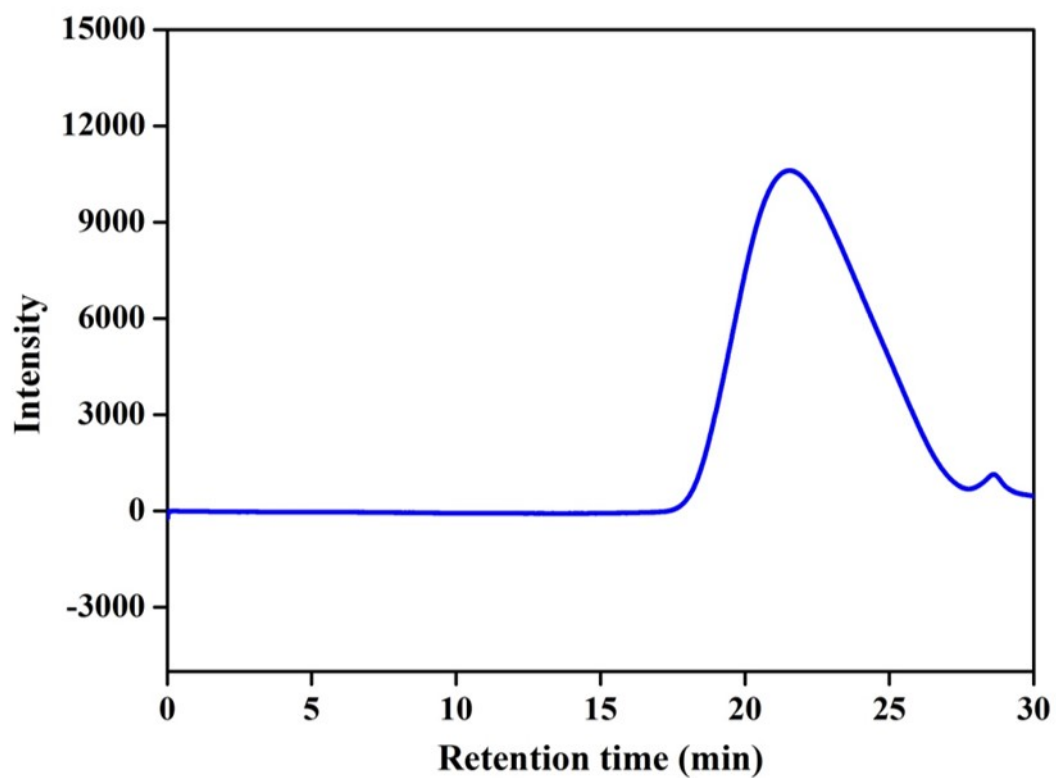

Figure S3. GPC chromatogram of (PFBE-co-VBC) co-polymer with PVBC and VBC ratio 3:1

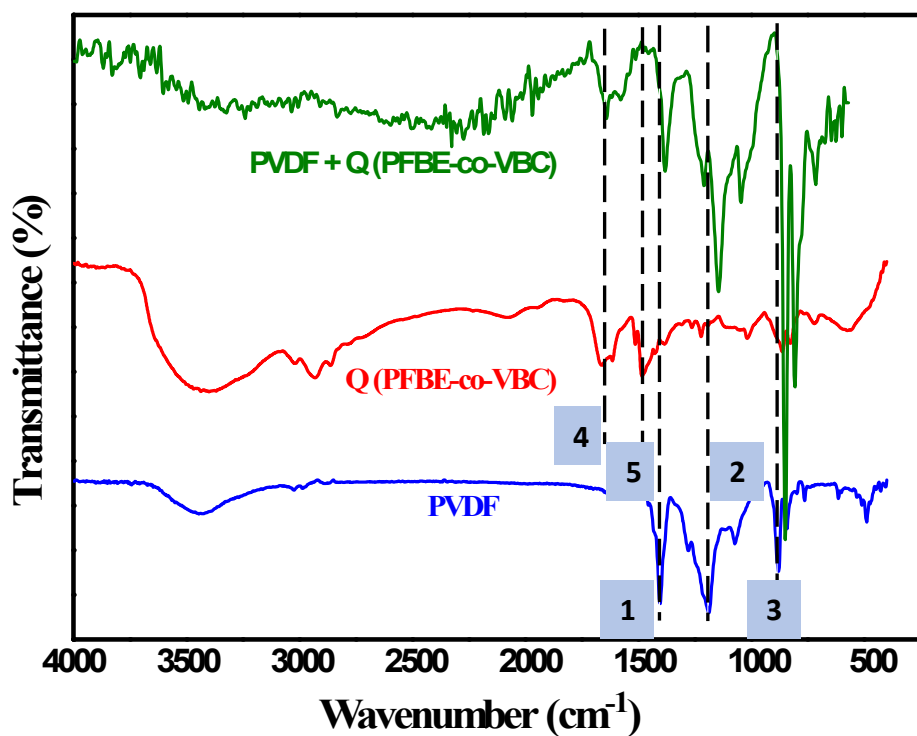

Figure S4. FTIR spectra of PVDF, Q (PFBE-co-VBC) polymers and PVDF - Q(PFBE-co-VBC) blend membranes

| Peak position | Wave number                                 | Peak assignments                                                                     |
|---------------|---------------------------------------------|--------------------------------------------------------------------------------------|
| 1             | 1402 $\text{cm}^{-1}$                       | C-F stretching vibration (PVDF)                                                      |
| 2             | 1188 $\text{cm}^{-1}$                       | $\text{CF}_2$ symmetrical stretching (PVDF)                                          |
| 3             | 880 $\text{cm}^{-1}$ & 840 $\text{cm}^{-1}$ | Mixed mode of $\text{CH}_2$ rocking and $\text{CF}_2$ asymmetrical stretching (PVDF) |
| 4             | 1660 $\text{cm}^{-1}$                       | C=C stretching (VBC of Q(PFBE-co-VBC))                                               |
| 5             | 1480 $\text{cm}^{-1}$                       | C-F stretching (PFBE of Q(PFBE-co-VBC) )                                             |

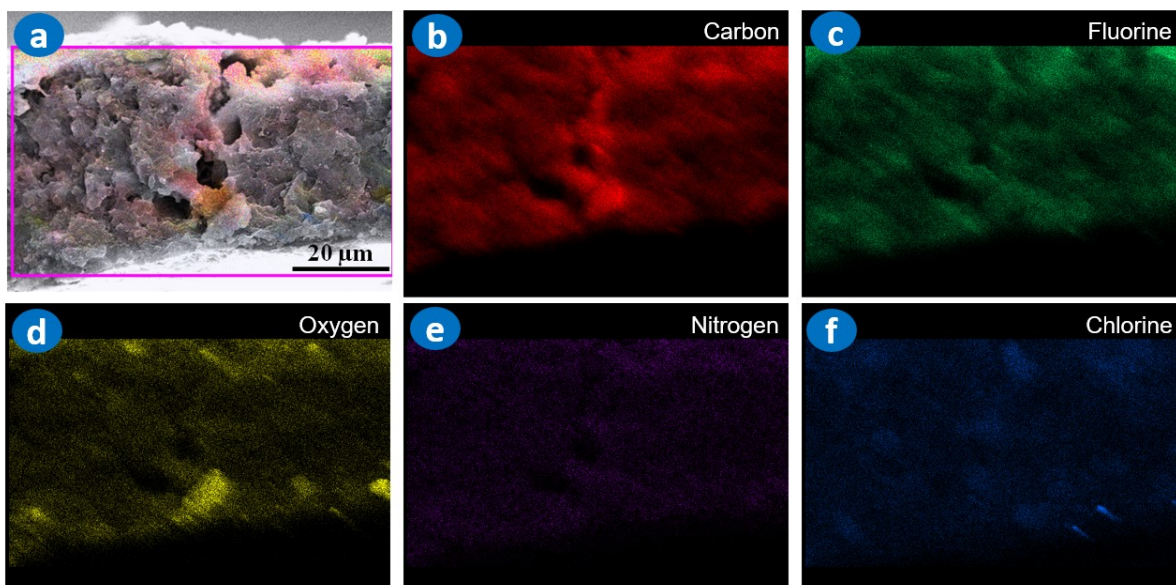

Figure S5. (a) FE-SEM cross-sectional image and (b), (c), (d), (e), (f) elemental mapping images of PVDF - Q (PFBE-co-VBC) blend membrane with 1: 0.33 ratio



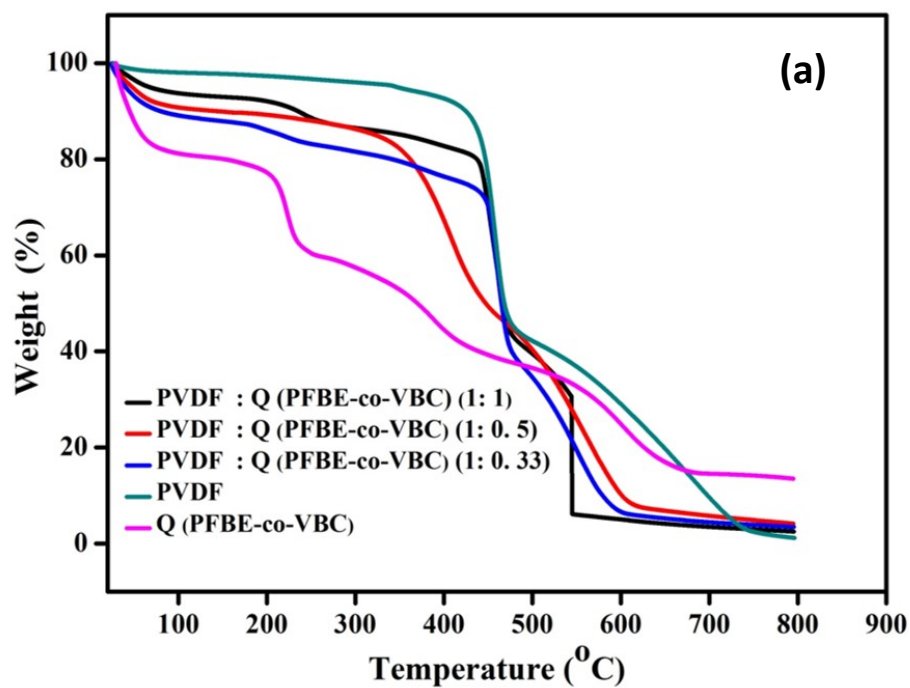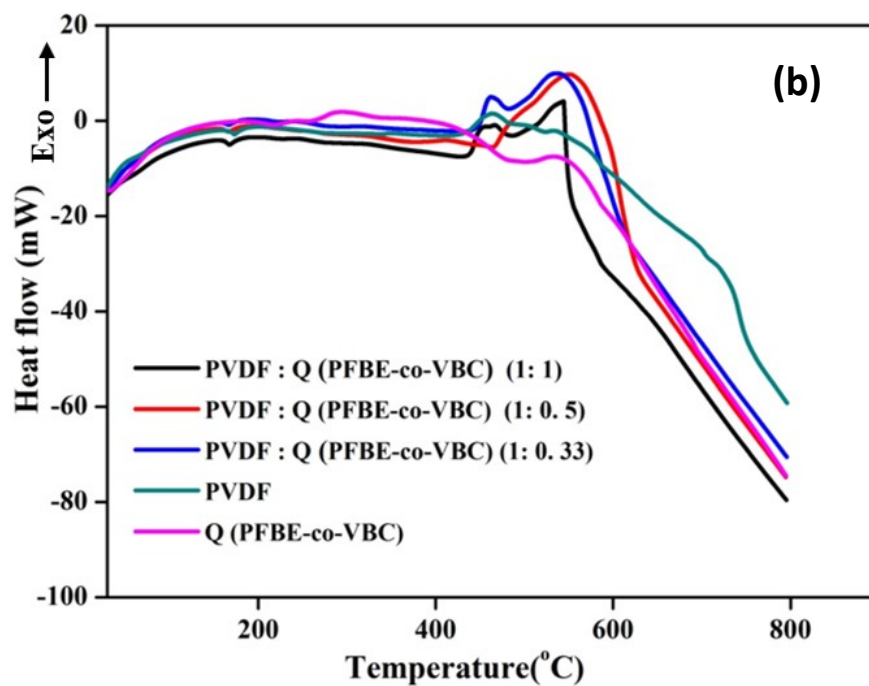

Figure S6. (a) TG curves and (b) DSC curves of the anion exchange membranes with different PVDF to Q (PFBE-Co-VBC) ratios

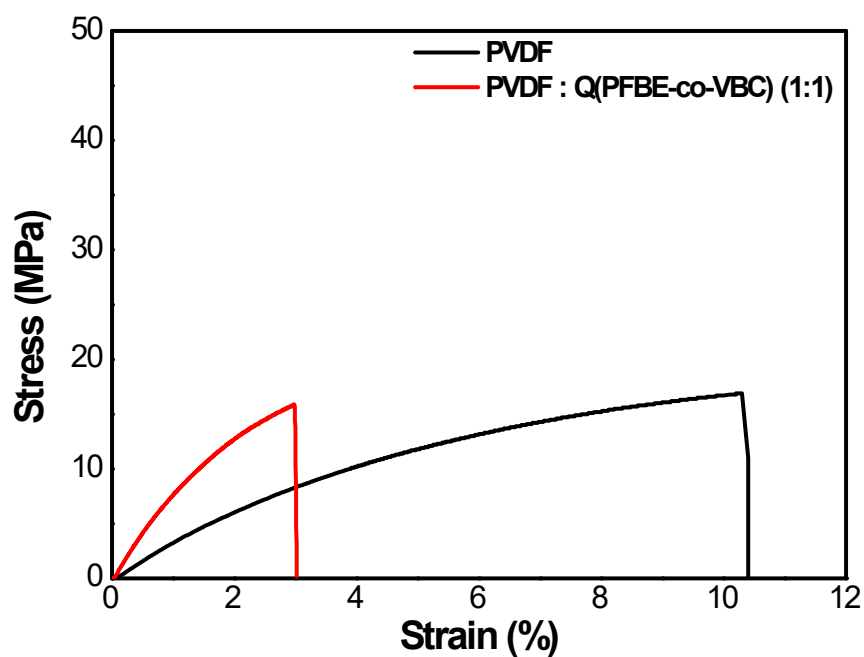

Figure S7. Tensile properties of PVDF - Q (PFBE-co-VBC) blend anion exchange membrane with 1:1 ratio

| Membrane                     | Tensile Modulus (MPa) | Ultimate stress (MPa) | Elongation (%) |
|------------------------------|-----------------------|-----------------------|----------------|
| PVDF – Q (PFBE-co-VBC) (1:1) | 5.1                   | 16.2                  | 3.2            |
| PVDF                         | 1.7                   | 14.0                  | 8.2            |

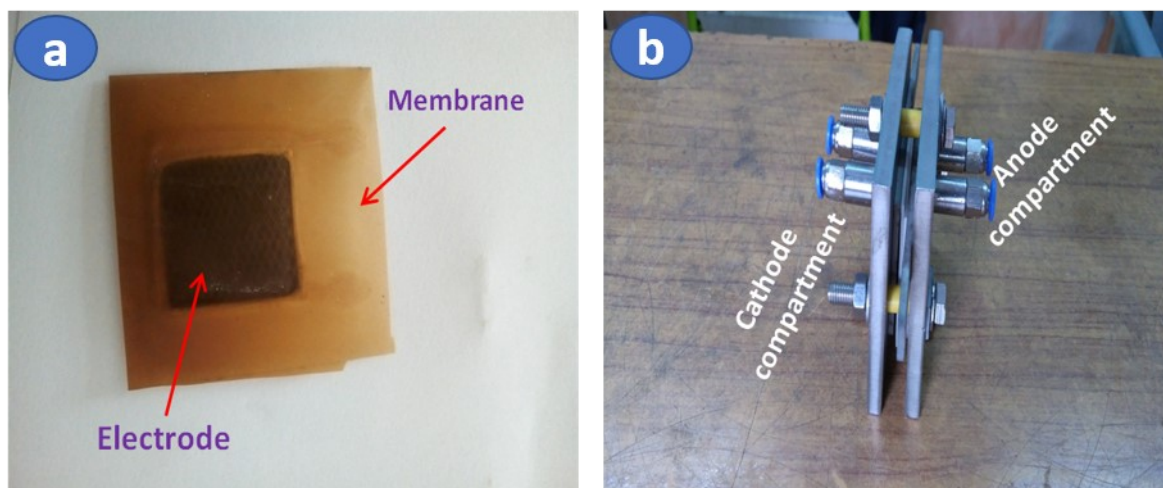

Figure S8. (a) Membrane-electrode-assembly and (b) Electrolyser cell configuration used in the current study

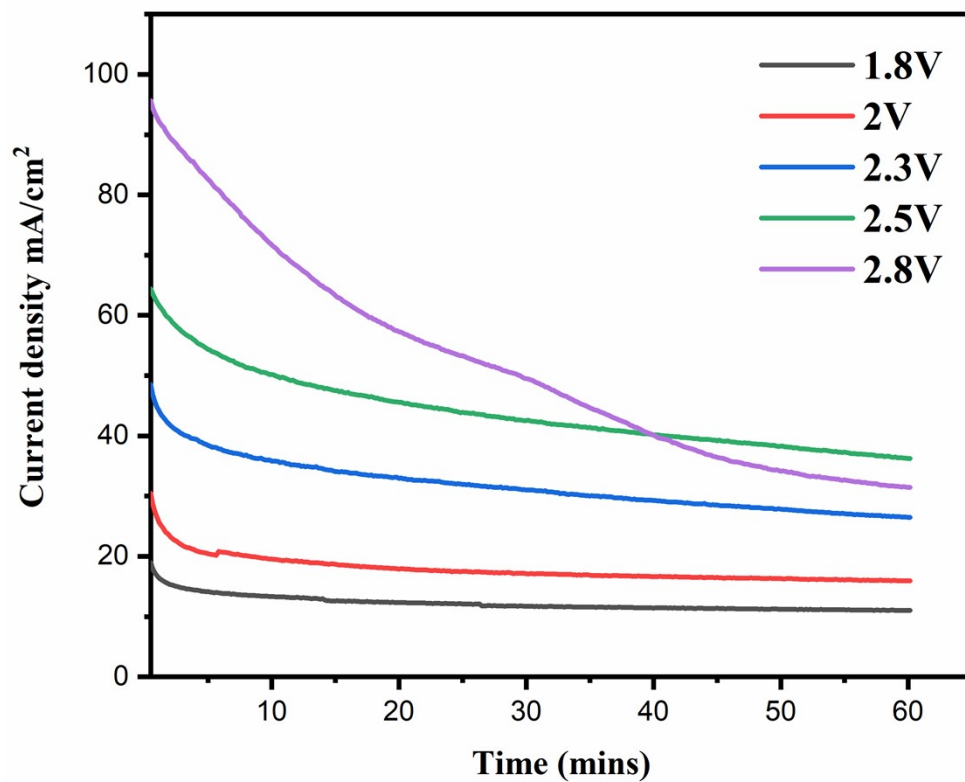

Figure S9. Chronoamperometry curves of the single cell using commercial FAA-3-50 membrane and Ni @ Ni-foam electrodes in 0.1M KOH solution at 25 °C
